# Supplementary material
Source: PubMed Central journal article supplement (PMC8488621)
Supplement: pnas.2101386118.sapp.pdf [file pnas.2101386118.sapp.pdf]

# Supplementary Information for

  

## Excess Mortality from COVID and non-COVID Causes in Minority Populations

Christopher J. Cronin, PhD  
University of Notre Dame  
ORCID: [0000-0002-6348-4175](https://orcid.org/0000-0002-6348-4175)

William N. Evans, PhD  
University of Notre Dame,  
NBER, and J-Pal  
ORCID: [0000-0002-3470-8627](https://orcid.org/0000-0002-3470-8627)

June 9, 2021

**Corresponding author:** Christopher J. Cronin, Assistant Professor, Department of Economics, University of Notre Dame, 3111 Jenkins Nanovic Halls, Notre Dame, IN 46556. Phone: (574) 631-0427.

**Email:** [ccronin1@nd.edu](mailto:ccronin1@nd.edu).

**This PDF file includes:**

Tables S1, S2  
Figures S1, S2, S3

Supplementary Tables and Figures

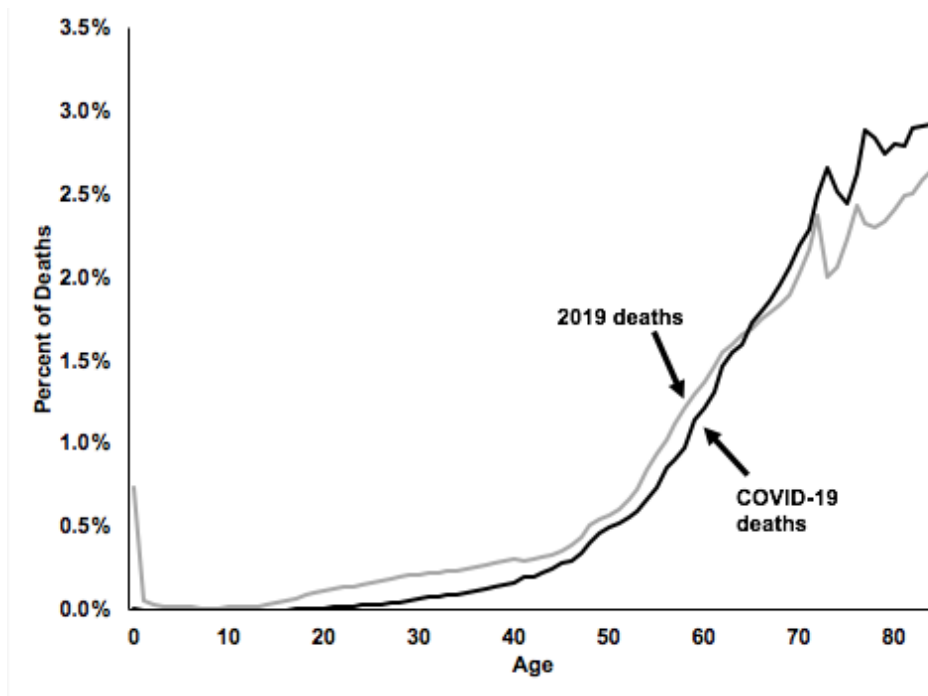

Figure S1: Percent of Deaths by Age, All Cause Deaths 2019 and COVID Deaths through 2/22/2021

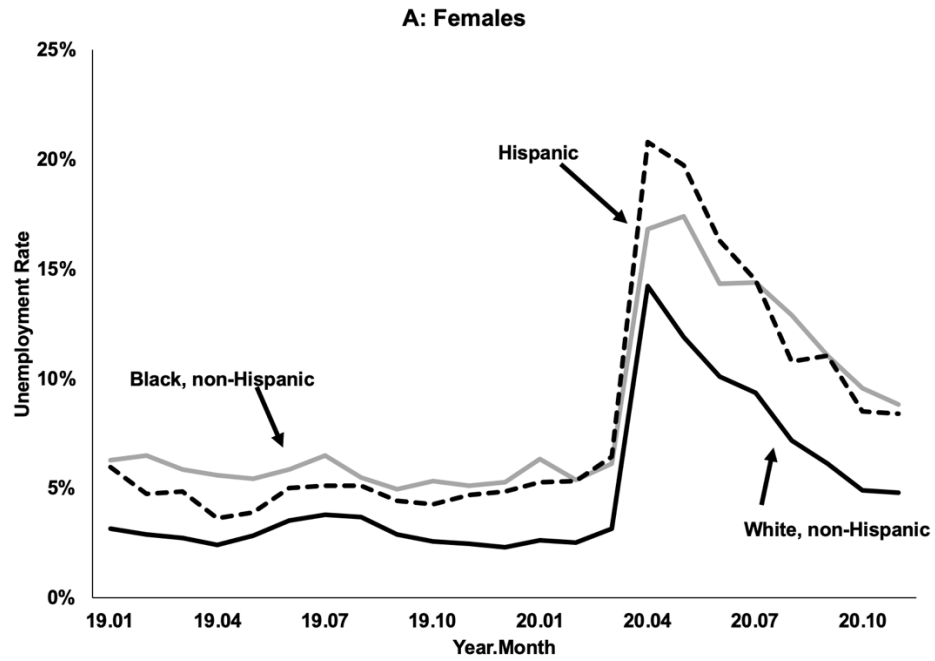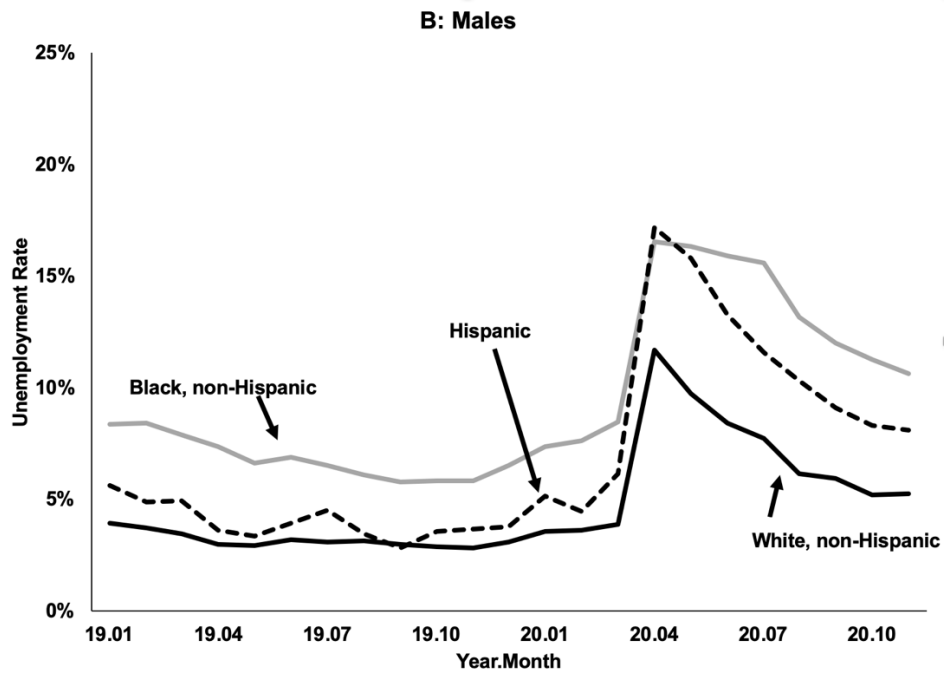

**Figure S2:** Unemployment Rates, 2019 and 2020, by Gender and Race/Ethnicity

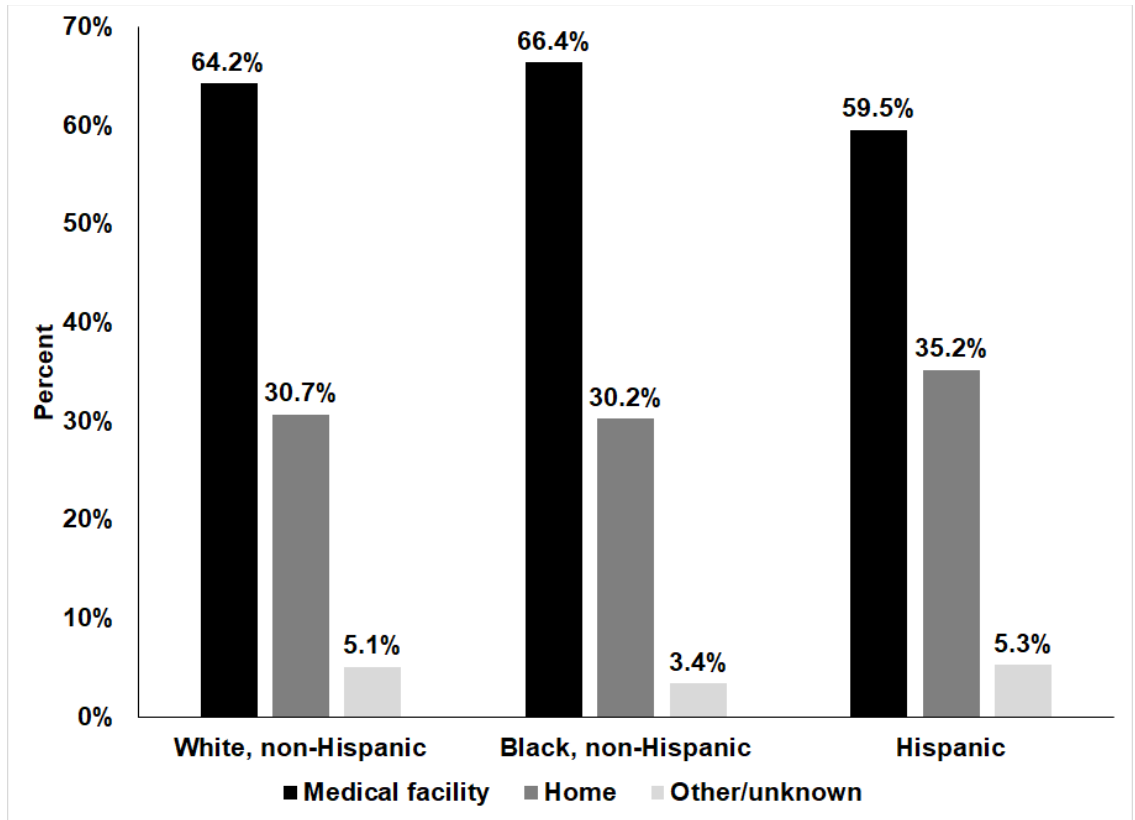

Figure S3: 2019 Place of Death for those 65+, by Race/Ethnicity

**Table S1:** Sensitivity of Excess Death Totals to Alternative Sets of Baseline Years

|                             | 2020 Excess Deaths |         |         |         |         |
|-----------------------------|--------------------|---------|---------|---------|---------|
|                             | 15-19              | 16-19   | 17-19   | 18-19   | 19      |
| Not Age-Population Adjusted | 543,711            | 523,207 | 507,189 | 499,217 | 473,354 |
| under 65                    | 123,786            | 120,127 | 120,392 | 122,952 | 121,505 |
| 65+                         | 419,915            | 403,079 | 386,798 | 376,265 | 353,849 |
| Age-Population Adjusted     | 405,234            | 406,916 | 413,591 | 429,129 | 427,074 |
| under 65                    | 119,036            | 117,004 | 118,515 | 121,915 | 121,047 |
| 65+                         | 286,199            | 289,911 | 295,077 | 307,215 | 306,027 |

**Table S2:** Sensitivity of Life Years Lost Calculations to Other Assumptions

| Group                   | Life years lost from all excess mortality in 2020<br>(in millions) |                                           |                                                                           |
|-------------------------|--------------------------------------------------------------------|-------------------------------------------|---------------------------------------------------------------------------|
|                         | Table 2<br>results                                                 | Using LYL<br>for median<br>age in age bin | Using the<br>simple<br>average of<br>LYL across<br>ages in the<br>age bin |
| All                     | 6.03                                                               | 5.98                                      | 6.00                                                                      |
| Females                 | 2.31                                                               | 2.29                                      | 2.30                                                                      |
| Males                   | 3.71                                                               | 3.69                                      | 3.70                                                                      |
| White                   | 2.93                                                               | 2.90                                      | 2.91                                                                      |
| Black/Hispanic          | 3.09                                                               | 3.09                                      | 3.09                                                                      |
| Non-Hisp. White females | 1.19                                                               | 1.17                                      | 1.18                                                                      |
| Non-Hisp. White males   | 1.75                                                               | 1.73                                      | 1.73                                                                      |
| Non-Hisp. Black females | 0.61                                                               | 0.60                                      | 0.60                                                                      |
| Non-Hisp. Black males   | 0.87                                                               | 0.87                                      | 0.87                                                                      |
| Hispanic females        | 0.52                                                               | 0.52                                      | 0.52                                                                      |
| Hispanic males          | 1.10                                                               | 1.09                                      | 1.10                                                                      |
